## Correction: A comparison of the clinicopathological features and prognoses of the classical and the tall cell variant of papillary thyroid cancer: a meta-analysis

Zeming Liu<sup>1,\*</sup>, Wen Zeng<sup>2,\*</sup>, Tianwen Chen<sup>1</sup>, Yawen Guo<sup>1</sup>, Chao Zhang<sup>3</sup>, Chunping Liu<sup>1,\*</sup> and Tao Huang<sup>1,\*</sup>

<sup>1</sup> Department of Breast and Thyroid Surgery, Union Hospital, Tongji Medical College, Huazhong University of Science and Technology, Wuhan 430022, China

<sup>2</sup> Department of Ophthalmology, Zhongnan Hospital, Wuhan University, Wuhan, Hubei, China

<sup>3</sup> Department of Cardiovascular Surgery, Union Hospital, Tongji Medical College, Huazhong University of Science and Technology, Wuhan, China

\* These authors contributed equally to this work

**Published:** March 23, 2018

**Copyright:** Liu et al. This is an open-access article distributed under the terms of the Creative Commons Attribution License 3.0 (CC BY 3.0), which permits unrestricted use, distribution, and reproduction in any medium, provided the original author and source are credited.

**This article has been corrected:** The proper name of the institution is as follows:

<sup>1</sup> Department of Breast and Thyroid Surgery, Union Hospital, Tongji Medical College, Huazhong University of Science and Technology, Wuhan 430022, China

Original article: Oncotarget. 2017; 8:6222-6232. <https://doi.org/10.18632/oncotarget.14055>
